# Supplementary material for: Multinuclear transition metal-containing polyoxometalates constructed from Nb/W mixed-addendum precursors: synthesis, structures and catalytic performance
Source: Royal Society of Chemistry journal article supplement (doi:10.1039/d1dt00924a), 2021-01-01
Supplement: d1dt00924a1.pdf [file d1dt00924a1.pdf]

## Supporting Information

### **Multinuclear transition metal-containing polyoxometalates constructed from Nb/W mixed-addendum precursor: synthesis, structures and catalytic performance**

Wanru Xiao,<sup>a</sup> Shujun Li,<sup>\*a</sup> Yue Zhao,<sup>a</sup> Yubin Ma,<sup>a</sup> Na Li,<sup>a</sup> Jie Zhang<sup>a</sup> and Xuenian  
Chen<sup>\*a,b</sup>

<sup>a</sup> School of Chemistry and Chemical Engineering, Henan Key Laboratory of Boron Chemistry and Advanced Energy Materials, Key Laboratory of Green Chemical Media and Reactions, Ministry of Education, Collaborative Innovation Centre of Henan Province for Green Manufacturing of Fine Chemicals, Henan Normal University

<sup>b</sup> College of Chemistry and Molecular Engineering Zhengzhou University

|                                                        |              |
|--------------------------------------------------------|--------------|
| <b>SI-1 Materials and Methods</b> .....                | <b>1</b>     |
| <b>SI-2 Synthesis of the title compounds</b> .....     | <b>1-2</b>   |
| <b>SI-3 Single-crystal X-ray Crystallography</b> ..... | <b>2-3</b>   |
| <b>SI-4 Structure figures</b> .....                    | <b>4-6</b>   |
| <b>SI-5 Powder X-ray diffraction patterns</b> .....    | <b>7</b>     |
| <b>SI-6 FTIR Spectroscopy</b> .....                    | <b>8</b>     |
| <b>SI-7 Thermal analyses</b> .....                     | <b>9</b>     |
| <b>SI-8 Cyanosilylation reaction</b> .....             | <b>10-16</b> |
| <b>SI-9 References</b> .....                           | <b>17</b>    |

## SI-1 Materials and Methods

The precursor  $K_8H[P_2W_{15}(NbO_2)_3O_{59}] \cdot 12H_2O$  was synthesized according to the procedure described in the literature.<sup>1</sup> All other reagents were obtained commercially and used without further purification. The FT-IR analysis in ATR mode was performed by a Perkin Elmer Spectrum 400 FT-IR/FT-FIR Spectrometer equipped with ATR objective lens in the range of 400-4000  $cm^{-1}$  at room temperature. Powder X-ray diffraction (PXRD) measurements were performed on a Panalytical X'Pert3 Powder diffractometer with graphite monochromatized Cu  $K\alpha$  radiation at 298 K. Thermal analyses were performed on a Netzsch 449C thermal analyzer. The sample was heated to 800 °C with a heating rate of 5 °C/min, under an  $N_2$  atmosphere. Elemental analyses were determined with a PLASMASPEC (I) ICP atomic emission spectrometer. X-ray photoelectron spectroscopy (XPS) measurements were performed on Thermo Fisher Scientific ESCALAB250Xi X-ray photoelectron spectroscopy. GC analyses were performed using Agilent GC6890.  $^1H$  NMR spectra were recorded on a Bruker AVANCE III HD 600MHZ spectrometer.

## SI-2 Synthesis of the title compounds

### Synthesis of $H_{19}[Cu_4(H_2O)_{15}(P_2W_{15}Nb_3O_{62})_3] \cdot 21H_2O$ (Cu-POM):

$K_8H[P_2W_{15}(NbO_2)_3O_{59}] \cdot 12H_2O$  (0.25 g, 0.05 mmol),  $NaHSO_3$  (0.05 g, 0.48 mmol) and  $Cu(NO_3)_2 \cdot 3H_2O$  (0.12 g, 0.5 mmol) were dispersed in a mixture of 7 mL  $H_2O$  and 3.5 mL ethanol in a 25-mL vial. Then, 2.5 mL formic acid was added. The tightly capped vial was placed in an oven at 100 °C for 3 days, and light green single crystals were obtained. Yield: 0.15 g (68.2% based on  $K_8H[P_2W_{15}(NbO_2)_3O_{59}] \cdot 12H_2O$ ). Anal. Calcd (%): Cu 1.93, P 1.41, W 62.71, Nb 6.34; found Cu 1.95, P 1.39, W 63.12, Nb 6.30. IR (KBr disks): 1578 (m), 1462 (m), 1083 (vs), 1014 (m), 944 (m), 894 (m), 723 (vs), 595 (w), 561 (w), 515 (s), 456 (w).

### Synthesis of $H_{19}[Co_4(H_2O)_7(P_2W_{15}Nb_3O_{62})_3] \cdot 15H_2O$ (Co-POM):

$K_8H[P_2W_{15}(NbO_2)_3O_{59}] \cdot 12H_2O$  (0.25 g, 0.05 mmol),  $NaHSO_3$  (0.05 g, 0.48 mmol) and  $CoCl_2 \cdot 6H_2O$  (0.12 g, 0.5 mmol) were dispersed in a mixture of 7 mL  $H_2O$  and 3.5 mL ethanol in a 25-mL vial. Then, 7 mL formic acid was added. The tightly capped vial was placed in an oven at 100 °C for 3 days, and light pink single crystals were obtained. Yield: 0.08 g (37.2% based on  $K_8H[P_2W_{15}(NbO_2)_3O_{59}] \cdot 12H_2O$ ). Anal. Calcd (%): Co 1.82, P 1.44, W 64.02, Nb 6.47; found Co 1.81, P 1.43, W 64.57, Nb 6.45. IR (KBr disks): 1615 (m), 1466 (m), 1083 (vs), 1014 (m), 944 (m), 889 (m), 726 (vs), 596 (m), 562 (vw), 516 (s), 460 (w).

### Synthesis of $H_{19}[Mn_4(H_2O)_7(P_2W_{15}Nb_3O_{62})_3] \cdot 6(HCOOH) \cdot 18H_2O$ (Mn-POM):

$K_8H[P_2W_{15}(NbO_2)_3O_{59}] \cdot 12H_2O$  (0.25 g, 0.05 mmol),  $NaHSO_3$  (0.05 g, 0.48 mmol) and  $MnCl_2$  (0.12 g, 0.9 mmol) were dispersed in a mixture of 7 mL  $H_2O$  and 3.5 mL ethanol in a 25-mL vial. Then, 4.5 mL formic acid was added. The tightly capped vial was placed in an oven at 100 °C for 3 days, and colorless single crystals were obtained. Yield: 0.13 g (58.9% based on  $K_8H[P_2W_{15}(NbO_2)_3O_{59}] \cdot 12H_2O$ ). Anal. Calcd (%): Mn 1.66, P 1.40, W 62.50, Nb 6.32; found Mn 1.68, P 1.40, W 62.98, Nb 6.30. IR (KBr disks): 1579 (m), 1463 (m), 1083 (vs), 1014 (m), 944 (s), 910 (m), 740 (vs), 597 (w), 562 (w), 518 (s), 460 (w).

### Synthesis of $H_{19}[Zn_4(H_2O)_7(P_2W_{15}Nb_3O_{62})_3] \cdot 23H_2O$ (Zn-POM):

$K_8H[P_2W_{15}(NbO_2)_3O_{59}] \cdot 12H_2O$  (0.25 g, 0.05 mmol),  $NaHSO_3$  (0.05 g, 0.48 mmol) and  $Zn(NO_3)_2 \cdot 6H_2O$  (0.30 g, 1.0 mmol) were dispersed in a mixture of 7 mL  $H_2O$  and 3.5 mL ethanol in a 25-mL vial. Then, 5 mL acetic acid was added. The tightly capped vial was placed in an oven

at 100 °C for 3 days, and colorless single crystals were obtained. Yield: 0.10 g (45.8% based on  $\text{K}_8\text{H}[\text{P}_2\text{W}_{15}(\text{NbO}_2)_3\text{O}_{59}]\cdot 12\text{H}_2\text{O}$ ). Anal. Calcd (%): Zn 2.00, P 1.42, W 63.19, Nb 6.39; found Zn 1.99, P 1.41, W 63.60, Nb 6.42. IR (KBr disks): 1582 (s), 1463 (s), 1082 (vs), 1015 (s), 943 (m), 893 (s), 724 (vs), 596 (vw), 562 (vw), 516 (m), 459 (w).

### SI-3 Single-crystal X-ray Crystallography

Single crystal XRD analysis of **Cu-POM**, **Co-POM**, **Mn-POM** and **Zn-POM** were recorded on a SuperNova Dual diffractometer using graphite-monochromated Cu  $K\alpha$  radiation,  $\lambda = 1.54184$  Å. The linear absorption coefficients, scattering factors for the atoms, and anomalous dispersion corrections were taken from the International Tables for X-Ray Crystallography. Empirical absorption corrections were applied. Structures were solved using direct methods (SHELXT)<sup>2</sup> and refined by full-matrix least-squares (SHELXL) interfaced with the programme OLEX2.<sup>3</sup> Anisotropic thermal parameters were used to refine all non-hydrogen atoms, with the exception for a few oxygen atoms. Those hydrogen atoms attached to lattice water molecules were not located. Crystallization water molecules and guest molecules were estimated by thermogravimetry and only partial guest molecules were achieved with the X-ray structure analysis. The crystal data and structure refinement results are summarized in Table S1. Further details on the crystal structure investigations can be obtained free of charge from The Cambridge Crystallographic Data Centre via <https://www.ccdc.cam.ac.uk/structures/> by quoting the depository numbers CCDC-2044367 (**Cu-POM**), CCDC-2044368 (**Co-POM**), CCDC-2044369 (**Mn-POM**), CCDC-2044370 (**Zn-POM**).

Table S1. Crystal data and structural refinements.

| Compounds                                      | <b>Cu-POM</b>                                                                                   | <b>Co-POM</b>                                                                                   | <b>Mn-POM</b>                                                                                                  | <b>Zn-POM</b>                                                                                   |
|------------------------------------------------|-------------------------------------------------------------------------------------------------|-------------------------------------------------------------------------------------------------|----------------------------------------------------------------------------------------------------------------|-------------------------------------------------------------------------------------------------|
| Formula                                        | H <sub>91</sub> Cu <sub>4</sub> O <sub>222</sub> Nb <sub>9</sub> P <sub>6</sub> W <sub>45</sub> | H <sub>63</sub> Co <sub>4</sub> O <sub>208</sub> Nb <sub>9</sub> P <sub>6</sub> W <sub>45</sub> | C <sub>6</sub> H <sub>81</sub> Mn <sub>4</sub> O <sub>223</sub> Nb <sub>9</sub> P <sub>6</sub> W <sub>45</sub> | H <sub>79</sub> Zn <sub>4</sub> O <sub>216</sub> Nb <sub>9</sub> P <sub>6</sub> W <sub>45</sub> |
| Formula weight (g·mol <sup>-1</sup> )          | 13192.57                                                                                        | 12921.90                                                                                        | 13236.12                                                                                                       | 13091.93                                                                                        |
| <i>T</i> (K)                                   | 293(2)                                                                                          | 170.00(10)                                                                                      | 150.00(10)                                                                                                     | 149.99(10)                                                                                      |
| Wavelength Cu-K (Å)                            | 1.54184                                                                                         | 1.54184                                                                                         | 1.54184                                                                                                        | 1.54184                                                                                         |
| Crystal system                                 | trigonal                                                                                        | trigonal                                                                                        | trigonal                                                                                                       | trigonal                                                                                        |
| Space group                                    | P-3                                                                                             | P-3                                                                                             | P-3                                                                                                            | P-3                                                                                             |
| <i>a</i> (Å)                                   | 34.2443(4)                                                                                      | 33.8321(5)                                                                                      | 34.5750(3)                                                                                                     | 34.2369(4)                                                                                      |
| <i>b</i> (Å)                                   | 34.2443(4)                                                                                      | 33.8321(5)                                                                                      | 34.5750(3)                                                                                                     | 34.2369(4)                                                                                      |
| <i>c</i> (Å)                                   | 13.7584(2)                                                                                      | 13.5769(3)                                                                                      | 13.6491(2)                                                                                                     | 13.7551(2)                                                                                      |
| $\alpha$ (°)                                   | 90                                                                                              | 90                                                                                              | 90                                                                                                             | 90                                                                                              |
| $\beta$ (°)                                    | 90                                                                                              | 90                                                                                              | 90                                                                                                             | 90                                                                                              |
| $\gamma$ (°)                                   | 120                                                                                             | 120                                                                                             | 120                                                                                                            | 120                                                                                             |
| <i>V</i> (Å <sup>3</sup> )                     | 13972.5(4)                                                                                      | 13458.3(5)                                                                                      | 14130.5(3)                                                                                                     | 13963.1(4)                                                                                      |
| <i>Z</i>                                       | 6                                                                                               | 2                                                                                               | 2                                                                                                              | 2                                                                                               |
| <i>D</i> <sub>calc</sub> (mg m <sup>-3</sup> ) | 3.084                                                                                           | 3.118                                                                                           | 3.041                                                                                                          | 3.080                                                                                           |
| $\mu$ (mm <sup>-1</sup> )                      | 37.494                                                                                          | 40.378                                                                                          | 38.144                                                                                                         | 37.557                                                                                          |
| <i>F</i> (000)                                 | 11234.0                                                                                         | 10898.0                                                                                         | 11206.0                                                                                                        | 11210.0                                                                                         |
| Crystalsize (mm)                               | 0.1 × 0.05 × 0.05                                                                               | 0.1 × 0.05 × 0.05                                                                               | 0.1 × 0.05 × 0.05                                                                                              | 0.15 × 0.05 × 0.05                                                                              |
| Goodness-of-fit on <i>F</i> <sup>2</sup>       | 1.062                                                                                           | 1.023                                                                                           | 1.062                                                                                                          | 1.045                                                                                           |
| Final <i>R</i> indices                         | R <sub>1</sub> = 0.0805,                                                                        | R <sub>1</sub> = 0.0647                                                                         | R <sub>1</sub> = 0.0899                                                                                        | R <sub>1</sub> = 0.0877                                                                         |
| [ <i>I</i> > 2σ( <i>I</i> )] <sup>[a]</sup>    | wR <sub>2</sub> = 0.2105                                                                        | wR <sub>2</sub> = 0.1728                                                                        | wR <sub>2</sub> = 0.2073                                                                                       | wR <sub>2</sub> = 0.2130                                                                        |
| <i>R</i> indices <sup>[a]</sup>                | R <sub>1</sub> = 0.0998,                                                                        | R <sub>1</sub> = 0.0848                                                                         | R <sub>1</sub> = 0.1223                                                                                        | R <sub>1</sub> = 0.1023                                                                         |
| (all data)                                     | wR <sub>2</sub> = 0.2266                                                                        | wR <sub>2</sub> = 0.1876                                                                        | wR <sub>2</sub> = 0.2226                                                                                       | wR <sub>2</sub> = 0.2234                                                                        |

$$[a] R_1 = \frac{\sum ||F_o| - |F_c||}{\sum |F_o|}; wR_2 = \left\{ \frac{\sum [w(F_o^2 - F_c^2)^2]}{\sum [w(F_o^2)^2]} \right\}^{1/2}$$

## SI-4 Structure figures

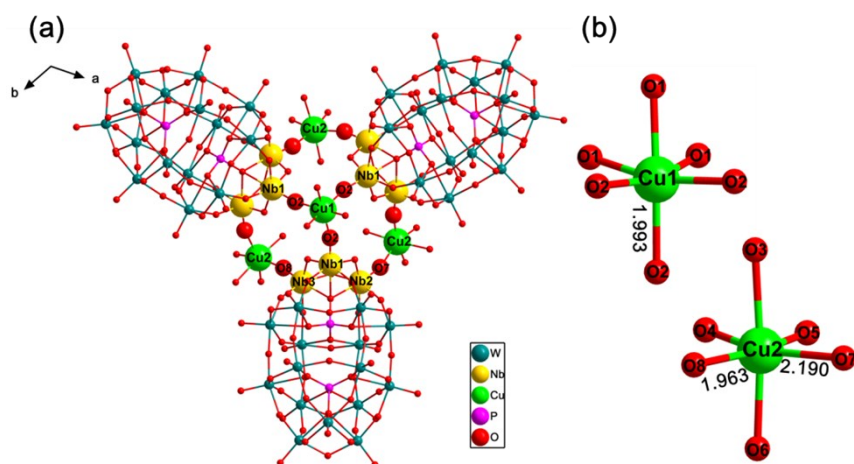

**Figure S1.** Ball-and-stick representation of connection between Cu ion and POM in **Cu-POM** (a), and the coordination environment of Cu1 and Cu2 ion (b).

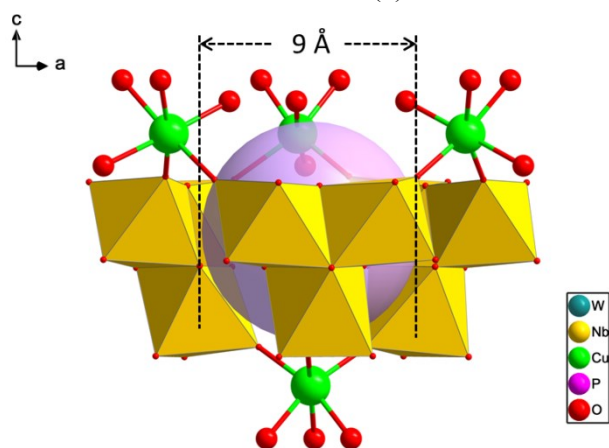

**Figure S2.** The structure of bowl-shape in **Cu-POM**.

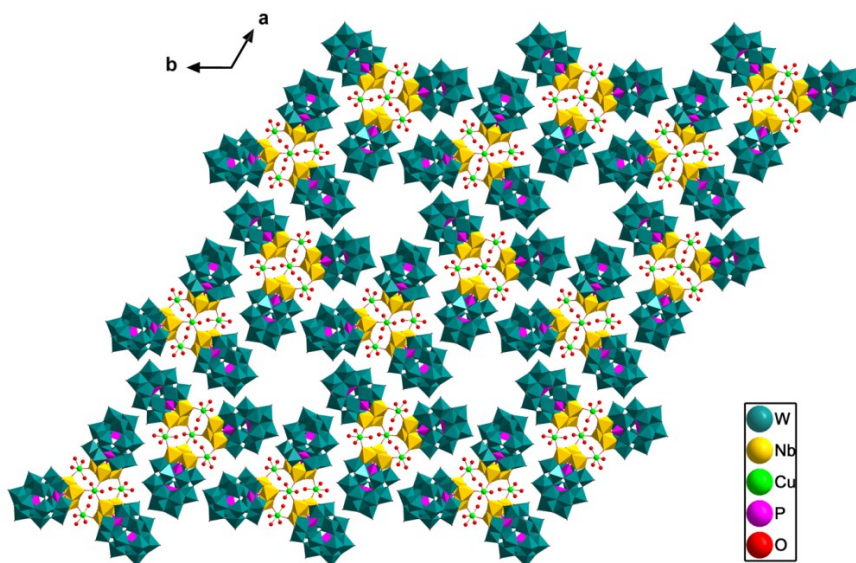

**Figure S3.** The packing structure of **Cu-POM** viewing along the *c* axis.

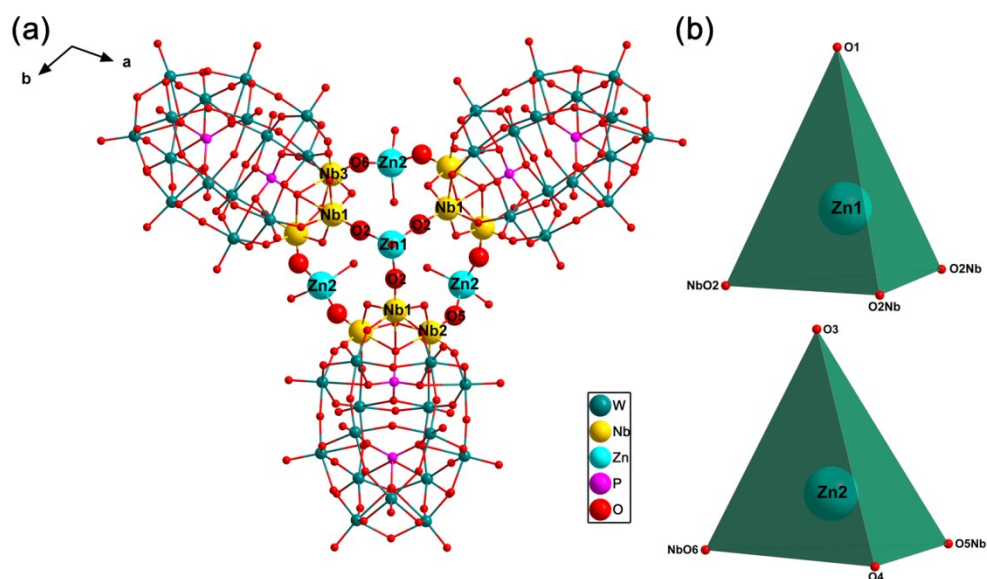

**Figure S4.** Ball-and-stick representation of connection between Zn ion and POM in **Zn-POM** (a); and the coordination environment of Zn1 and Zn2 ion (b).

**Table S2.** Bond valence calculations of select O atoms of four compounds.

| Atom | Bond   | Distance / Å | Bond Valence |
|------|--------|--------------|--------------|
| O1   | O1-Cu1 | 1.973        | 0.452        |
| O3   | O3-Cu2 | 2.146        | 0.283        |
| O4   | O4-Cu2 | 2.024        | 0.394        |
| O5   | O5-Cu2 | 1.957        | 0.472        |
| O6   | O6-Cu2 | 2.093        | 0.327        |
|      |        |              |              |
| O1   | O1-Co1 | 2.111        | 0.322        |
| O3   | O3-Co2 | 2.090        | 0.341        |
| O4   | O4-Co2 | 2.078        | 0.352        |
|      |        |              |              |
| O1   | O1-Mn1 | 2.101        | 0.431        |
| O3   | O3-Mn2 | 2.133        | 0.369        |
| O4   | O4-Mn2 | 2.087        | 0.448        |
|      |        |              |              |
| O1   | O1-Zn1 | 2.129        | 0.317        |
| O3   | O3-Zn2 | 2.097        | 0.346        |
| O4   | O4-Zn2 | 2.081        | 0.361        |

**Table S3.** Bond valence sum calculations of Cu, Co, Mn and Zn ions of four compounds.

| Atom | Bond      | Distance / Å | Bond Valence | Bond Valence Sum (BVS) |
|------|-----------|--------------|--------------|------------------------|
| Cu1  | Cu1-O1(1) | 1.973        | 0.365        | 2.130                  |
|      | Cu1-O1(2) | 1.973        | 0.365        |                        |
|      | Cu1-O1(3) | 1.973        | 0.365        |                        |
|      | Cu1-O2(1) | 1.994        | 0.345        |                        |
|      | Cu1-O2(2) | 1.994        | 0.345        |                        |
|      | Cu1-O2(3) | 1.994        | 0.345        |                        |
| Cu2  | Cu2-O3    | 2.146        | 0.229        | 1.771                  |
|      | Cu2-O4    | 2.024        | 0.318        |                        |
|      | Cu2-O5    | 1.957        | 0.381        |                        |
|      | Cu2-O6    | 2.093        | 0.264        |                        |
|      | Cu2-O7    | 2.187        | 0.205        |                        |
|      | Cu2-O8    | 1.964        | 0.374        |                        |
| Co1  | Co1-O1    | 2.111        | 0.322        | 1.837                  |
|      | Co1-O2(1) | 1.945        | 0.505        |                        |
|      | Co1-O2(2) | 1.945        | 0.505        |                        |
|      | Co1-O2(3) | 1.945        | 0.505        |                        |
| Co2  | Co2-O3    | 2.090        | 0.341        | 1.626                  |
|      | Co2-O4    | 2.078        | 0.344        |                        |
|      | Co2-O5    | 1.956        | 0.490        |                        |
|      | Co2-O6    | 1.987        | 0.451        |                        |
| Mn1  | Mn1-O1    | 2.101        | 0.431        | 2.537                  |
|      | Mn1-O2(1) | 1.921        | 0.702        |                        |
|      | Mn1-O2(2) | 1.921        | 0.702        |                        |
|      | Mn1-O2(3) | 1.921        | 0.702        |                        |
| Mn2  | Mn2-O3    | 2.133        | 0.396        | 2.263                  |
|      | Mn2-O4    | 2.087        | 0.448        |                        |
|      | Mn2-O5    | 1.918        | 0.708        |                        |
|      | Mn2-O6    | 1.916        | 0.711        |                        |
| Zn1  | Zn1-O1    | 2.129        | 0.317        | 1.856                  |
|      | Zn1-O2(1) | 1.951        | 0.513        |                        |
|      | Zn1-O2(2) | 1.951        | 0.513        |                        |
|      | Zn1-O2(3) | 1.951        | 0.513        |                        |
| Zn2  | Zn2-O3    | 2.097        | 0.346        | 1.669                  |
|      | Zn2-O4    | 2.081        | 0.361        |                        |
|      | Zn2-O5    | 2.001        | 0.448        |                        |
|      | Zn2-O6    | 1.950        | 0.514        |                        |

## SI-5 Powder X-ray diffraction patterns

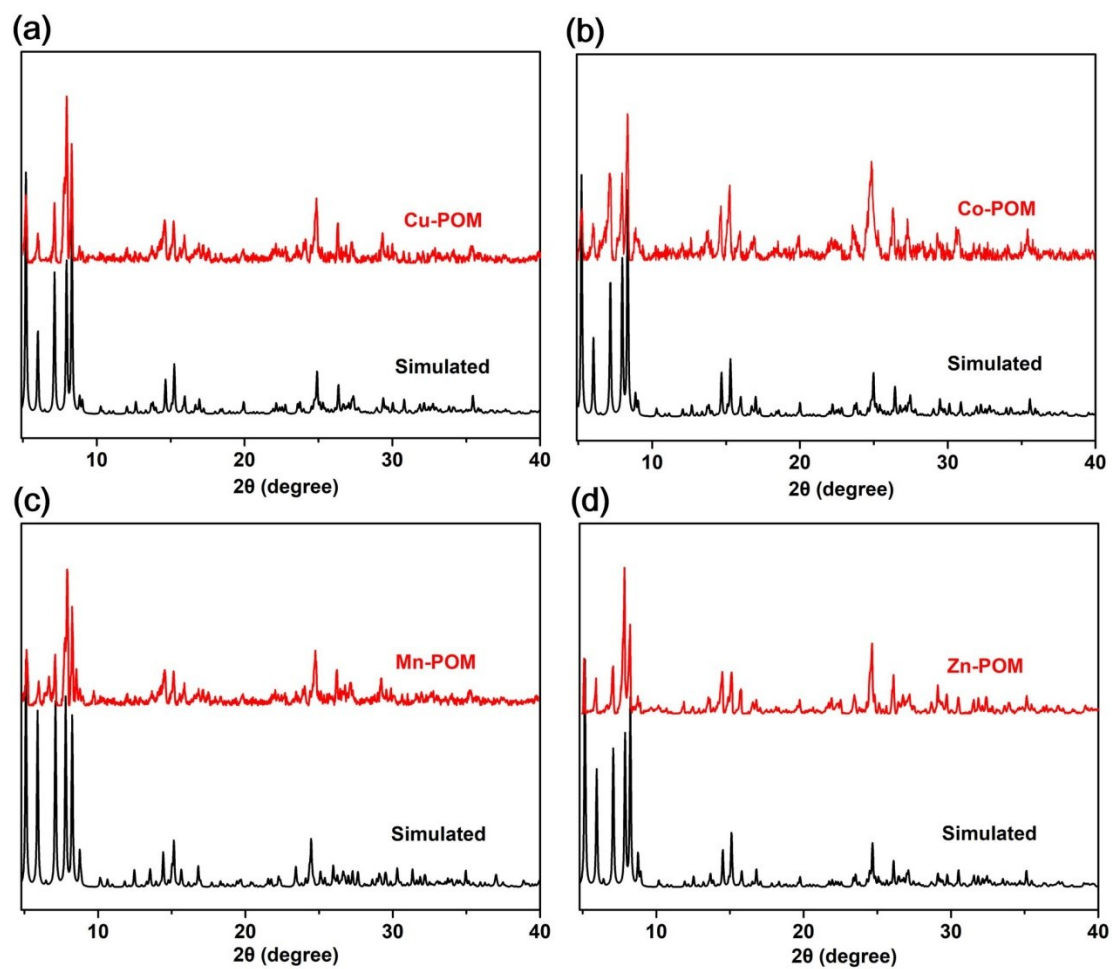

**Figure S5.** Simulated (black) and experimental (red) PXRD patterns of four compounds.



## SI-6 FTIR Spectroscopy

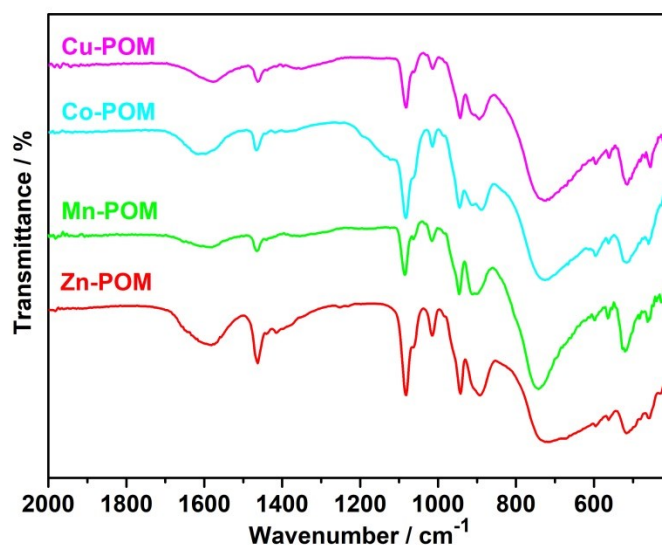

**Figure S6.** IR spectra of the four compounds.

The four compounds exhibit similar characteristic peak. The signals at  $1083\text{ cm}^{-1}$  and  $1014\text{ cm}^{-1}$  are attributed to vibrations of  $\text{P-O}_a$ ; the absorption peaks at the range of  $946\text{-}943\text{ cm}^{-1}$ ,  $892\text{-}889\text{ cm}^{-1}$ ,  $740\text{-}728\text{ cm}^{-1}$  are attributed to the  $\text{W-O}_t$ ,  $\text{W-O}_b\text{-W}$ ,  $\text{W-O}_c\text{-W}$  vibrations in the Dawson framework of four compounds.

## SI-7 Thermal analyses

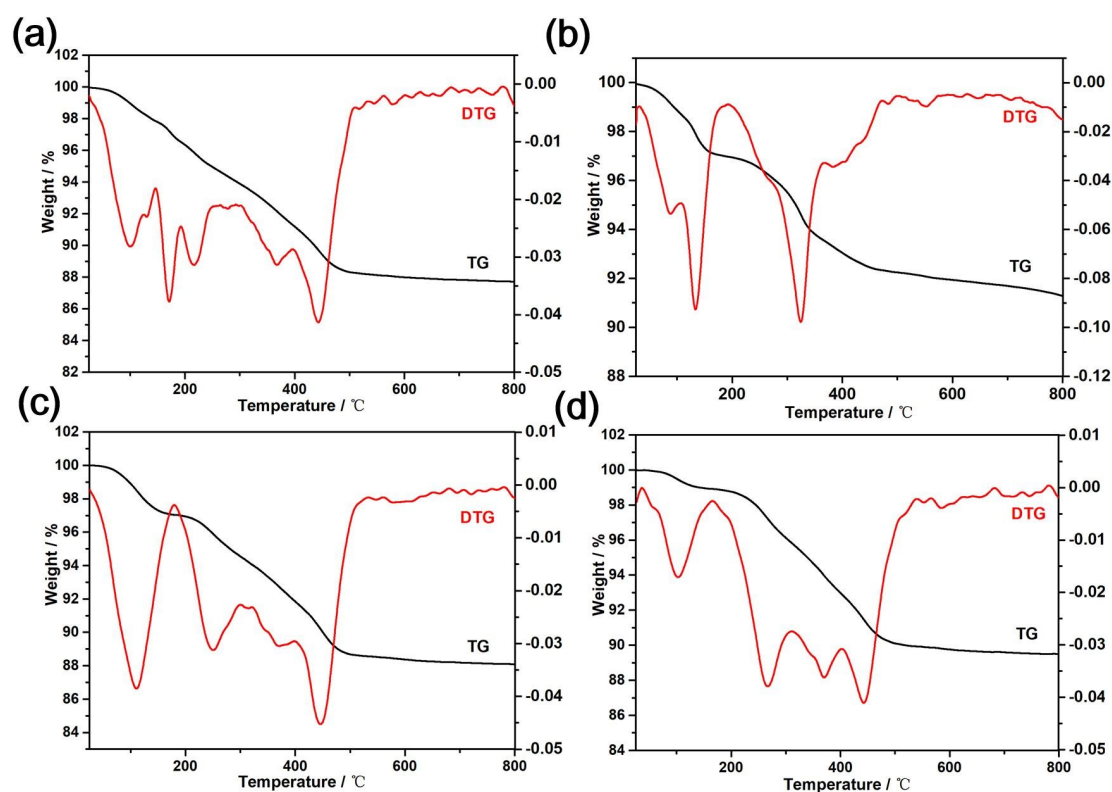

**Figure S7.** Thermogravimetric curves of **Cu-POM** (a), **Co-POM** (b), **Mn-POM** (c) and **Zn-POM** (d).

The thermal behavior of four compounds has been investigated under nitrogen atmospheres between 25 and 800 °C by thermogravimetric analysis (TGA) and the first derivative of the thermogravimetric (DTG). The TG curve of four compounds exhibits similar continuous weight loss process. For **Cu-POM**, the weight loss of 4.89% (4.91% calculated) from 25 to 243 °C is attributed to the loss of 21 lattice water molecules and 15 coordinated water molecules. The weight loss of 3.00% (3.06% calculated) from 25 to 185 °C for **Co-POM** is attributed to the loss of 15 lattice water molecules and 7 coordinated water molecules. The weight loss of 5.48% (5.49% calculated) from 25 to 301 °C for **Mn-POM** is attributed to the loss of 18 lattice water molecules, 6 formic acid molecule and 7 coordinated water molecules. The weight loss of 4.18% (4.13% calculated) from 25 to 311 °C for **Zn-POM** is attributed to the loss of 23 lattice water molecules and 7 coordinated water molecules. The rest weight losses before 800 °C of four compounds e.g. 6.92% (5.82% calculated) for **Cu-POM**, 5.05% (5.94% calculated) for **Co-POM**, 6.04% (5.75% calculated) for **Mn-POM**, and 5.93% (5.86% calculated) for **Zn-POM** can be ascribed to the dehydration of protons and the partial decomposition of polyoxoanions.<sup>4</sup>

## SI-8 Cyanosilylation reaction

A typical procedure for cyanosilylation reaction was performed as follows: 1.5 mmol TMS-CN, 0.5 mmol aldehydes/ketones, and 0.5 mol% catalysts were added to a 10 mL Schlenk tube in the absence of solvent. The reaction mixture was stirred at 25 °C under nitrogen atmosphere. The progress of the reaction of the aldehydes or ketones with TMS-CN was qualitatively analyzed by GC analyses. Yields were determined using  $^1\text{H}$  NMR by tracing the change of characteristic hydrogen resonance of in substrate aldehydes/ketones and products using  $\text{CDCl}_3$  as solvent. Before the catalytic test, the catalysts were activated at 100 °C under vacuum conditions to expose coordination unsaturated active sites.<sup>5,6</sup> After the reaction was completed, the catalysts were recovered by centrifugation and purified by washing with ethanol and then air-dried for the next cycle.

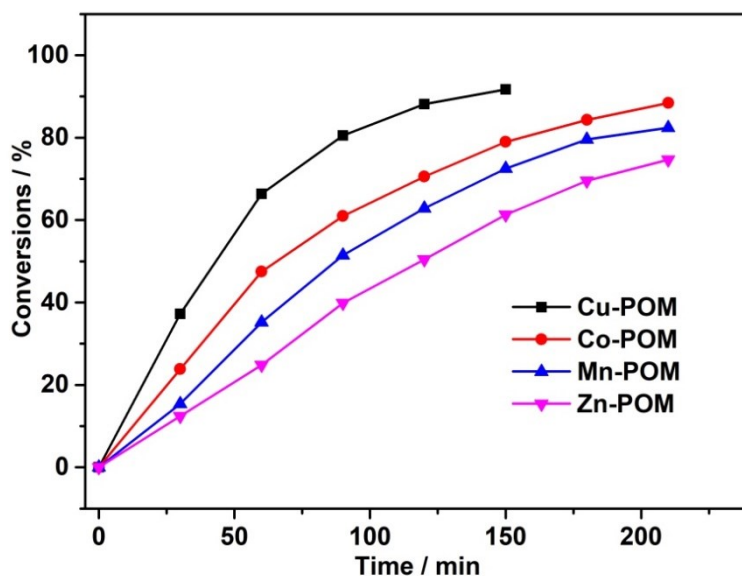

**Figure S8.** Conversions curves of cyanosilylation reaction of benzaldehyde catalyzed by four compounds.

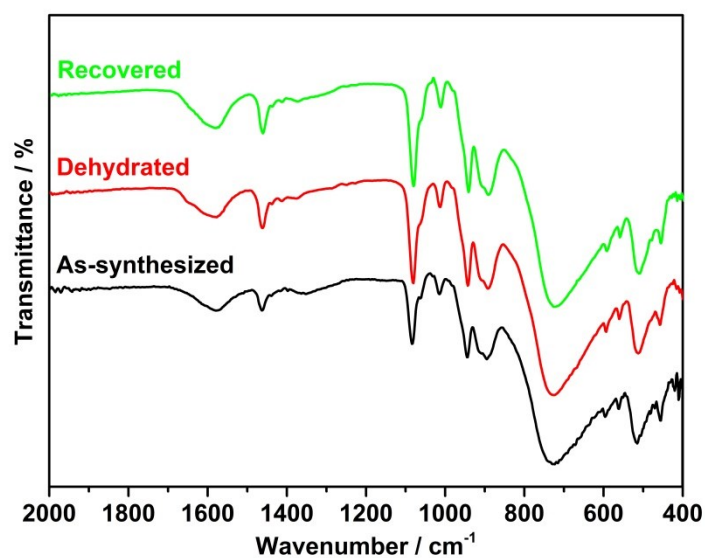

**Figure S9.** The IR spectra of Cu-POM before and after catalysis.

# <sup>1</sup>H NMR Spectra of Cyanosilylation Products<sup>7-9</sup>

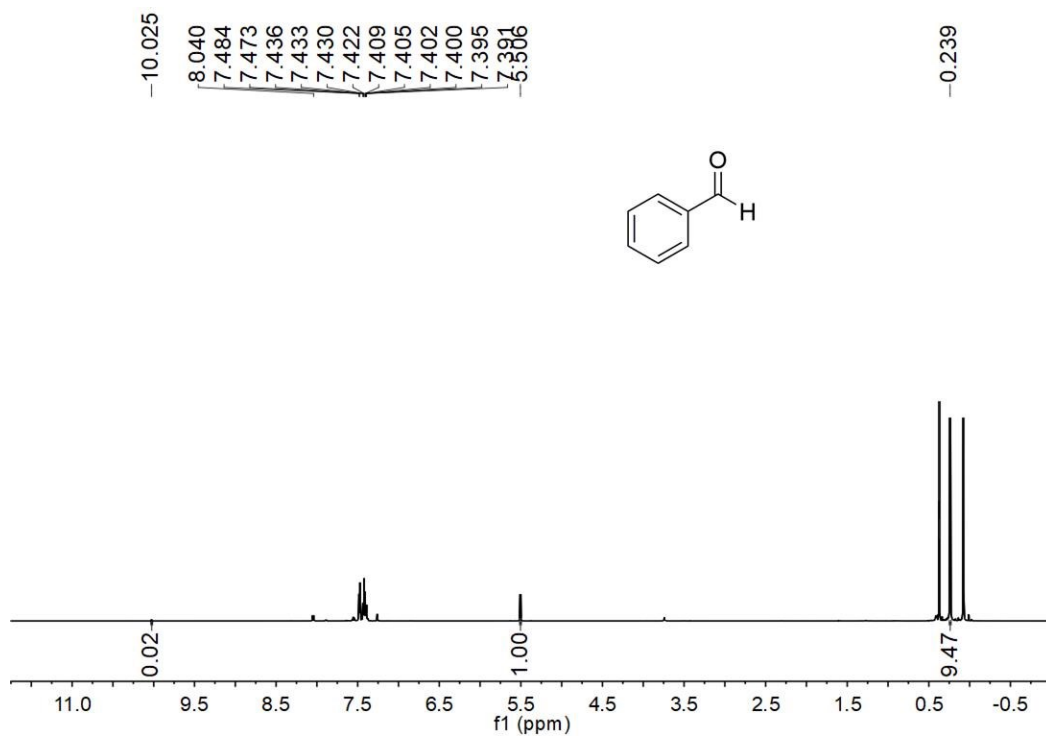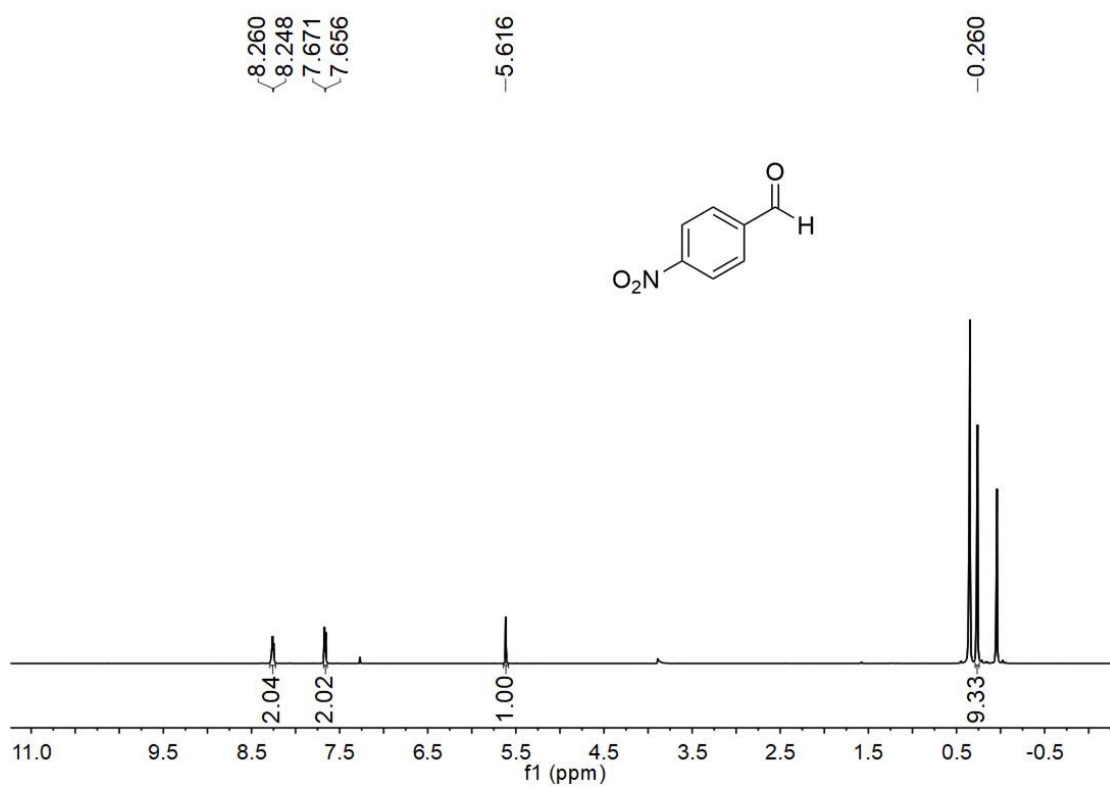

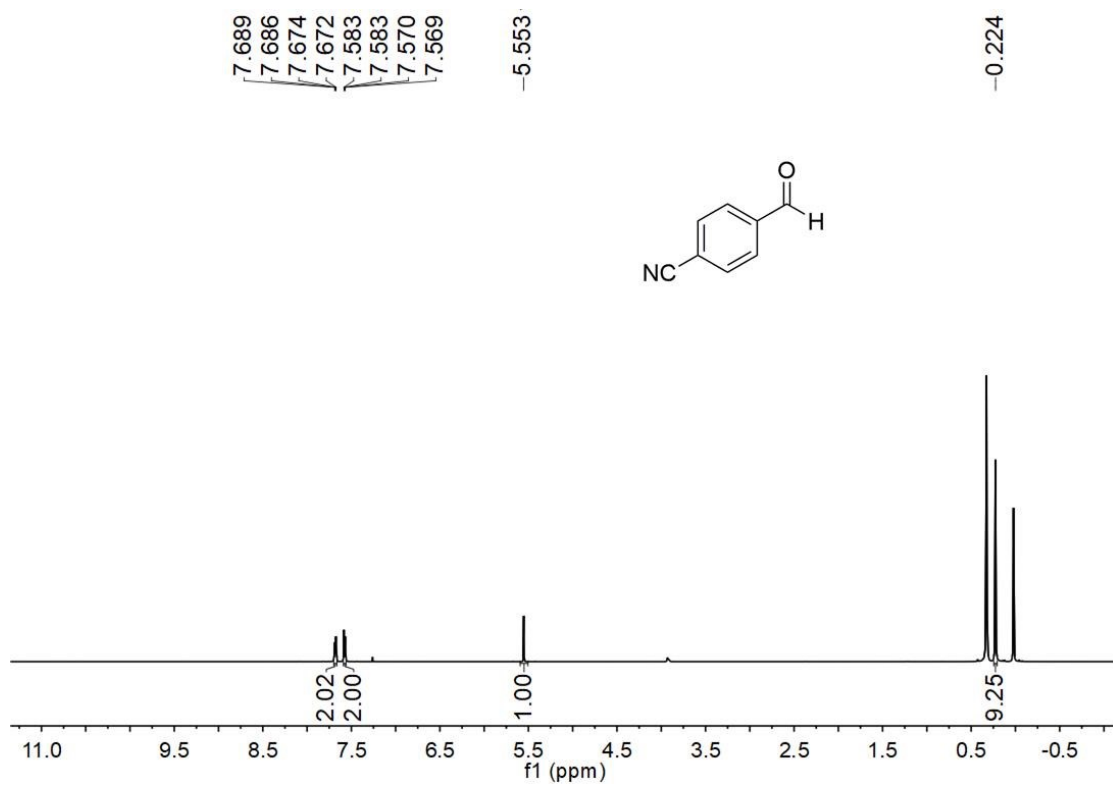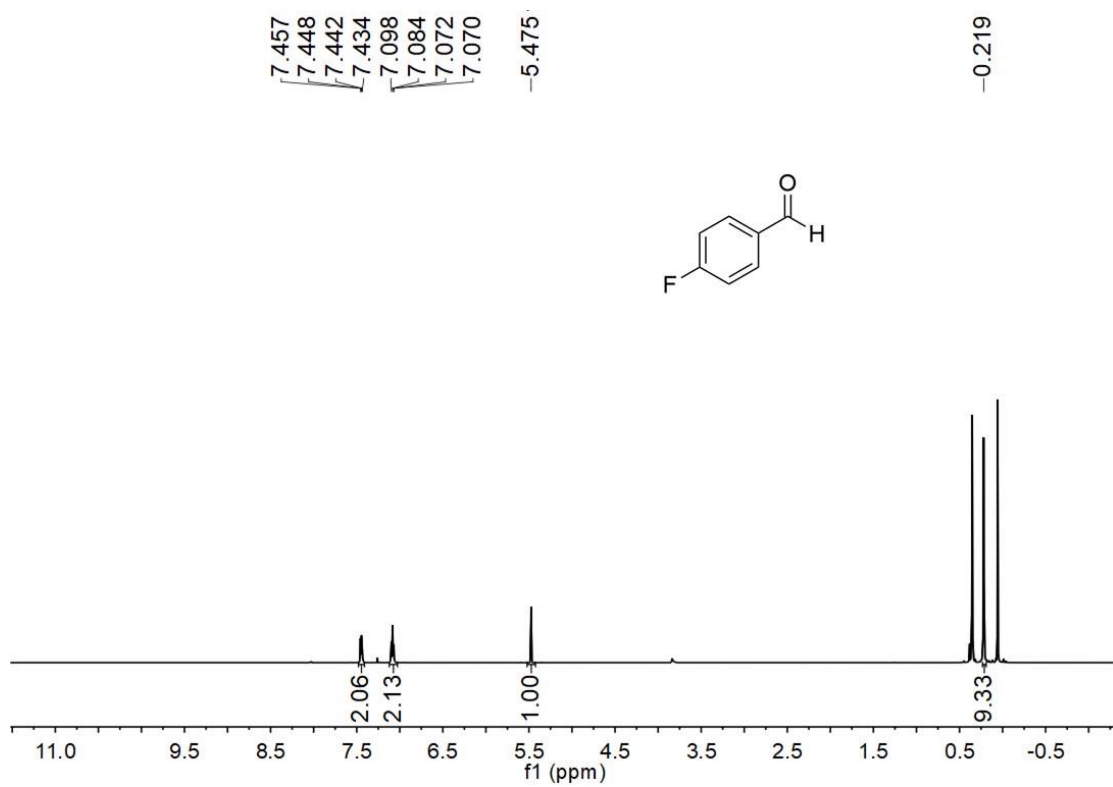

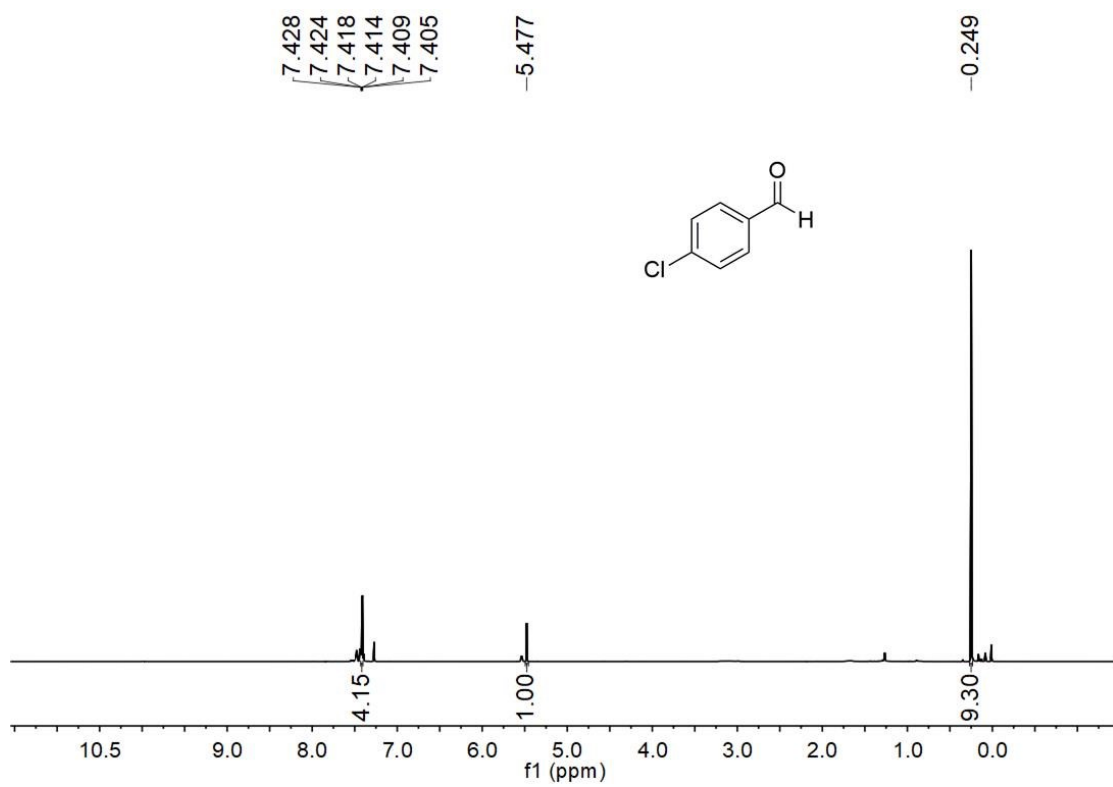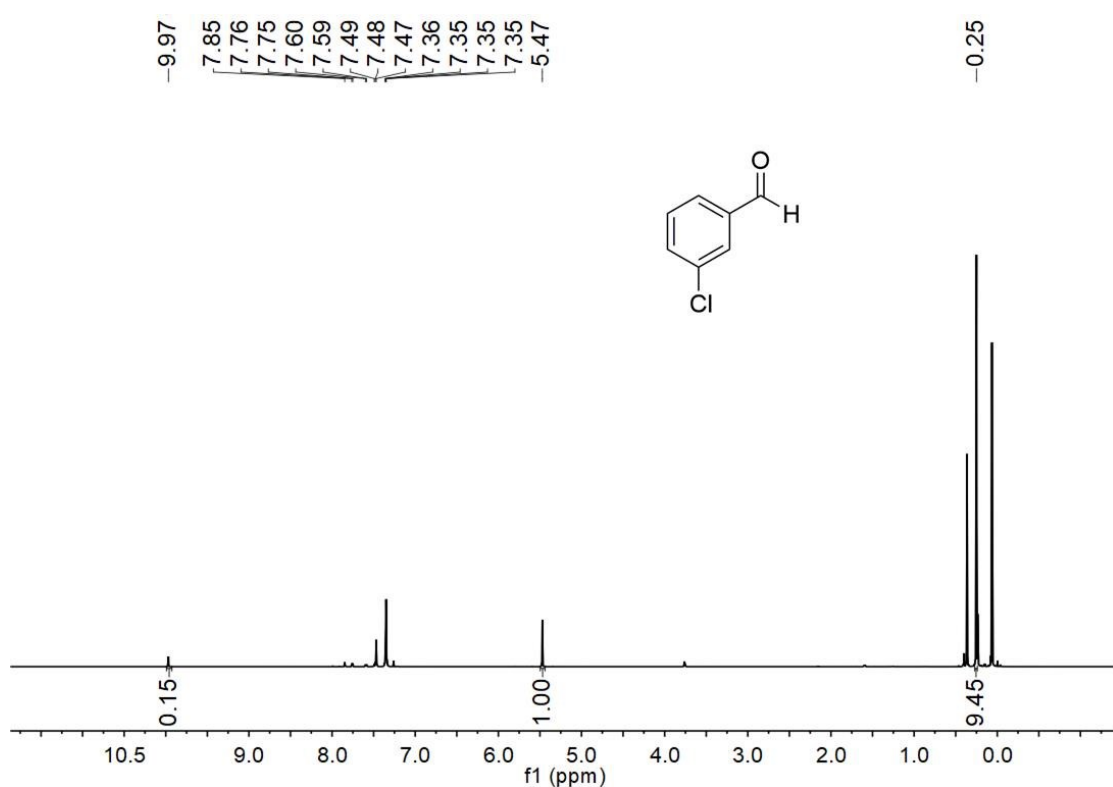

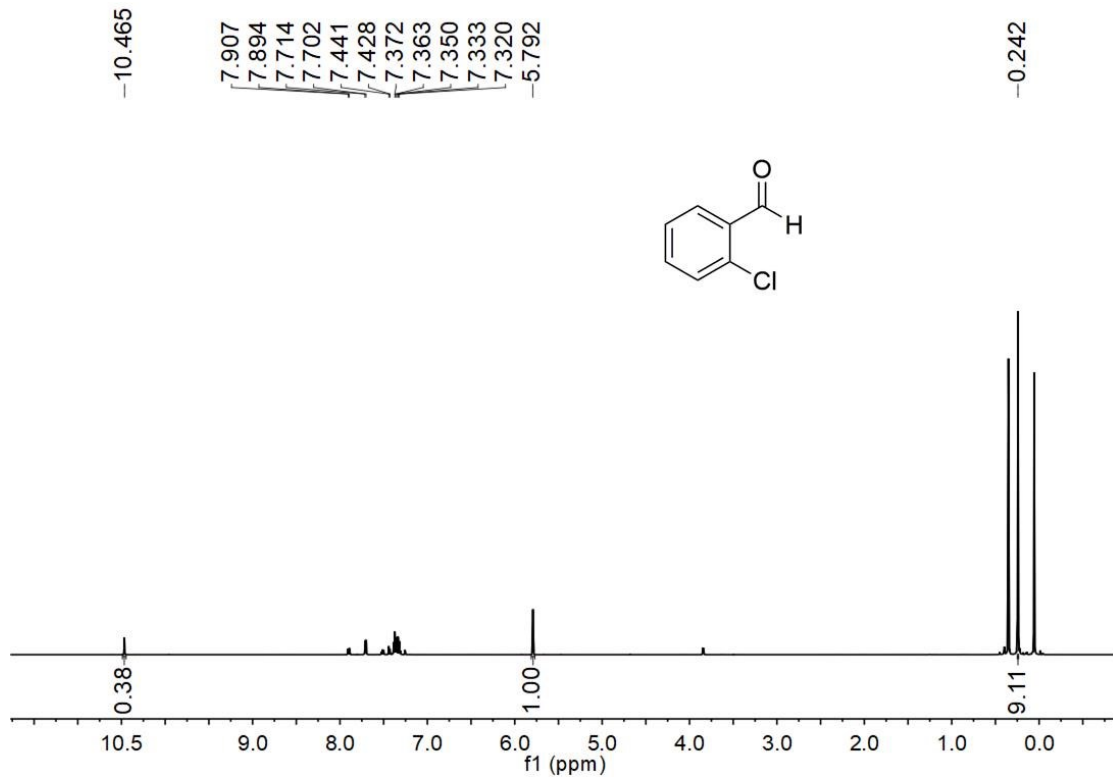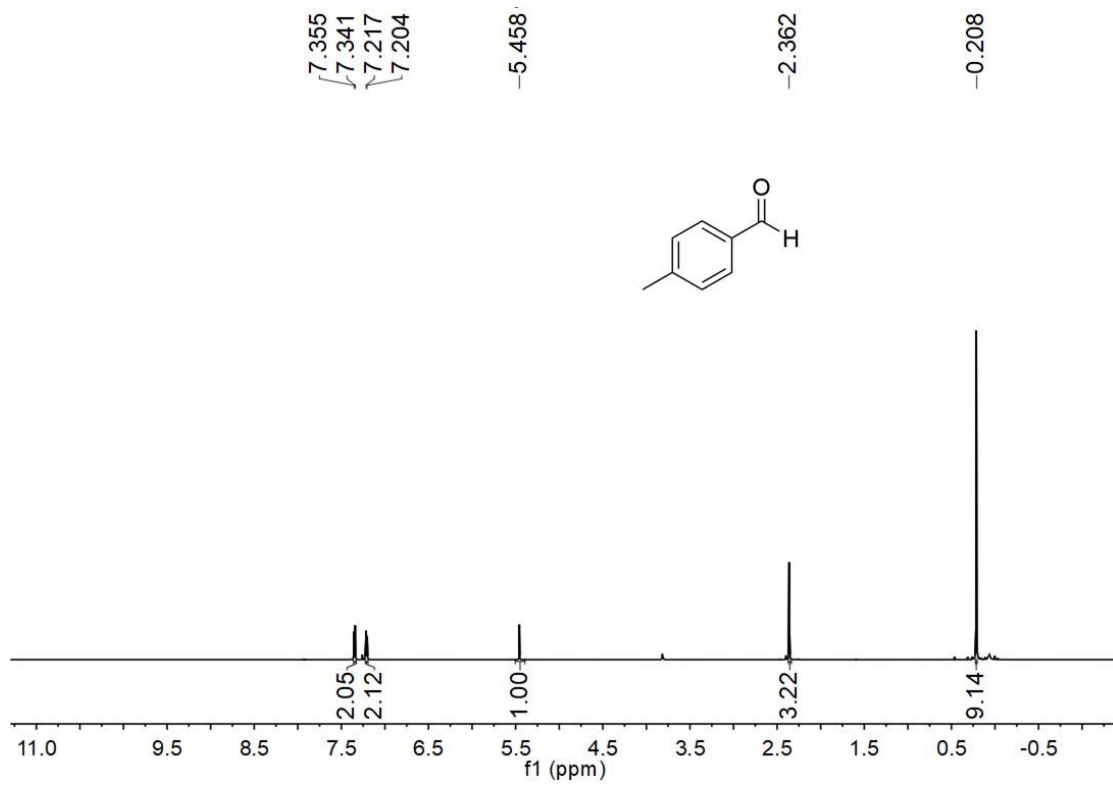

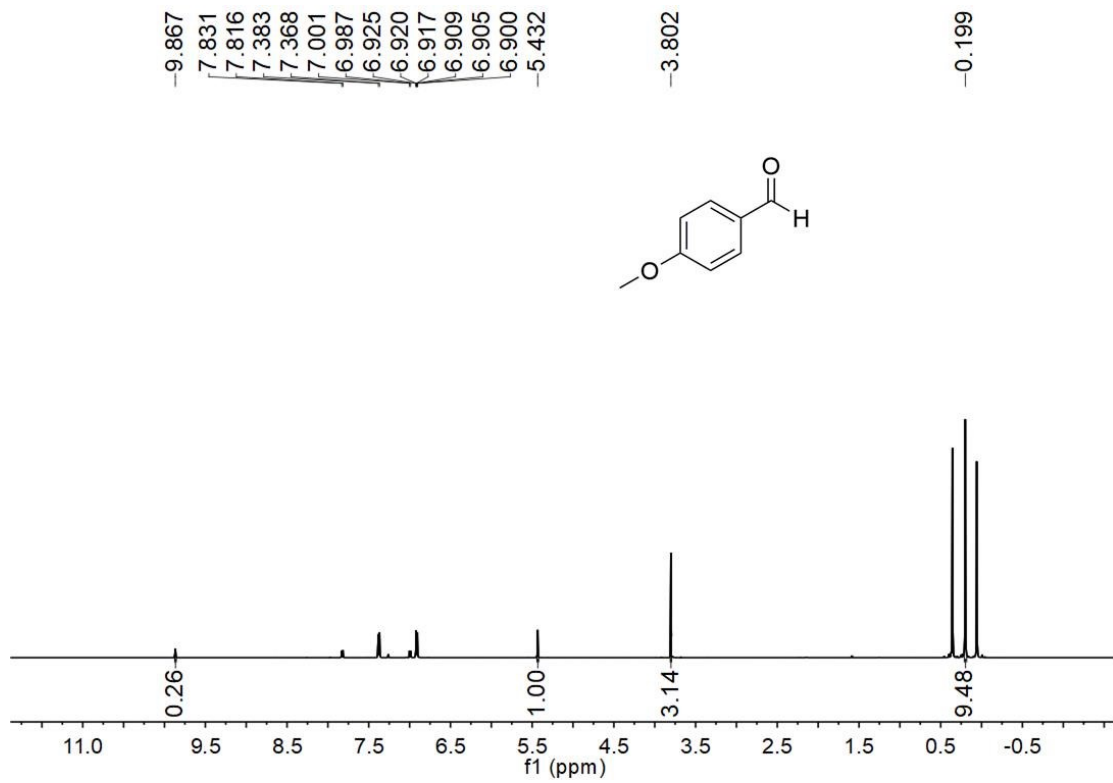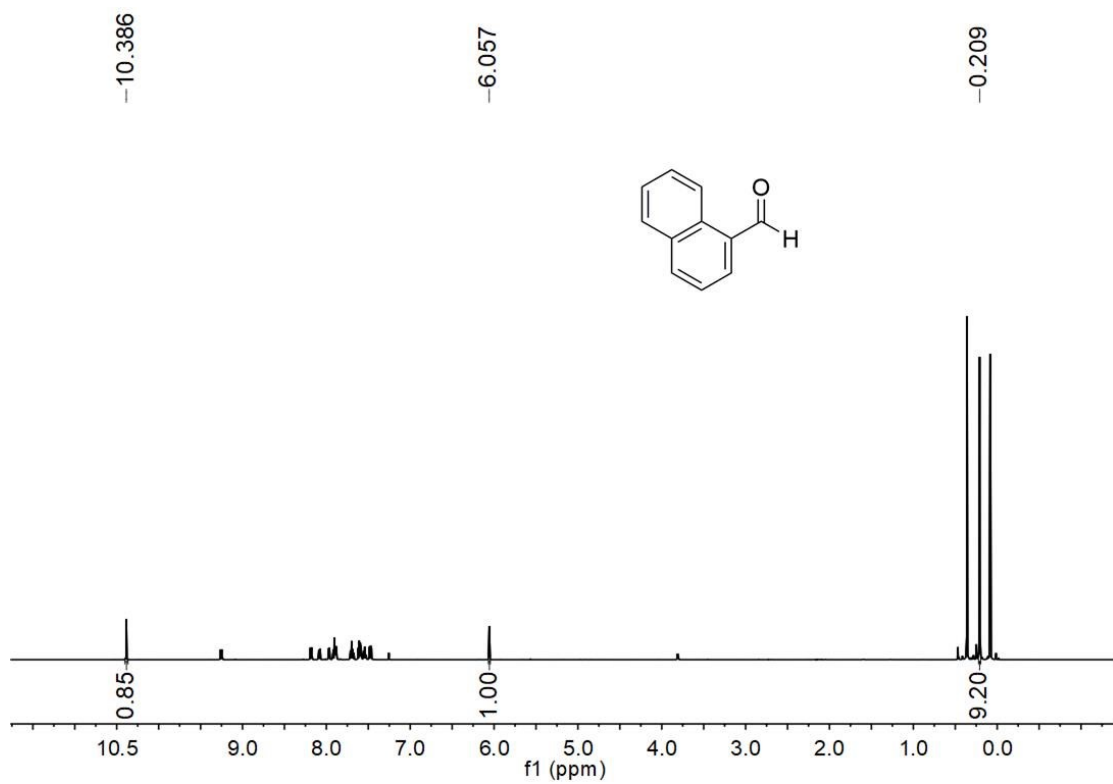



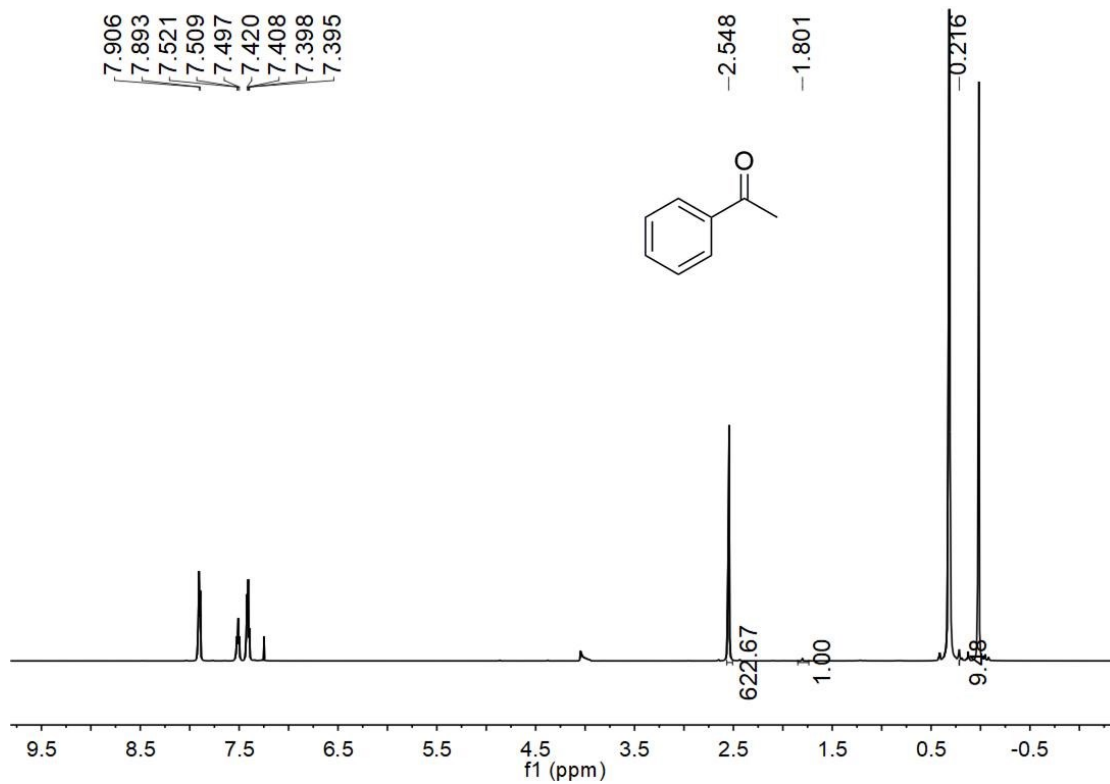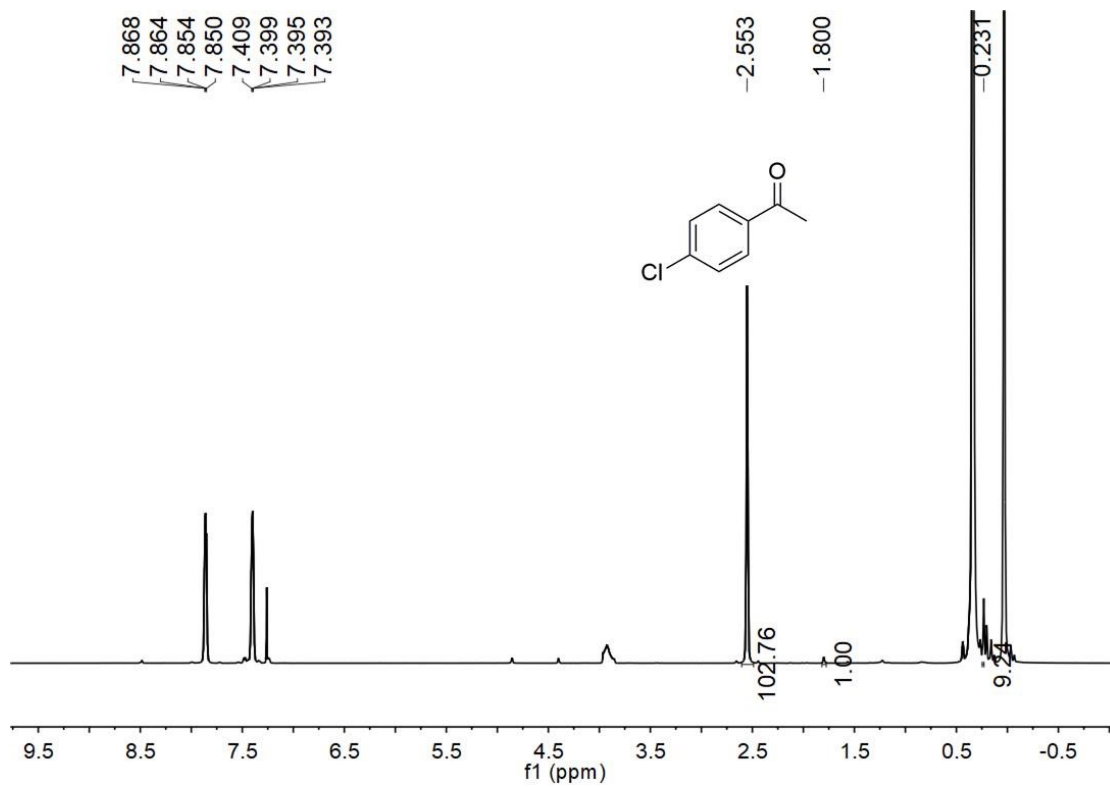

## SI-9 References

- 1 J. Gong, Y. G. Chen, L. Y. Qu and Q. Liu, *Polyhedron*, **1996**, *15*, 2273–2277.
- 2 G. M. Sheldrick, *Acta Cryst. A.*, 2008, **64**, 112-122.
- 3 O. V. Dolomanov, L. J. Bourhis, R. J. Gildea, J. A. K. Howard and H. Puschmann, *J. Appl. Cryst.*, 2009, **42**, 339-341.
- 4 J. Wang, P. Ma, S. Li, Q. Xu, Y. Li, J. Niu and J. Wang, *Inorg. Chem.*, 2019, **58**, 57-60.
- 5 T.-P. Hu, Y.-Q. Zhao, Z. Jagličić, K. Yu, X.-P. Wang and D. Sun, *Inorg. Chem.*, 2015, **54**, 7415-7423.
- 6 X.-N. Zhang, L. Liu, Z.-B. Han, M.-L. Gao and D.-Q. Yuan, *RSC Adv.*, 2015, **5**, 10119-10124.
- 7 W. Wang, M. Luo, W. Yao, M. Ma, S. A. Pullarkat, L. Xu and P.-H. Leung, *ACS Sustain. Chem. Eng.*, 2019, **7**, 1718-1722.
- 8 C. Zhu, Q. Xia, X. Chen, Y. Liu, X. Du and Y. Cui, *ACS Catal.*, 2016, **6**, 7590-7596.
- 9 S. Rawat, M. Bhandari, B. Prashanth and S. Singh, *ChemCatChem*, 2020, **12**, 2407-2411.
